# Supplementary material
Source: PubMed Central journal article supplement (PMC3477619)
Supplement: NIHMS379133-supplement-Supporting_Information.pdf [file NIHMS379133-supplement-Supporting_Information.pdf]

## Supporting Information

### **Insight into the rescue of oxidized soluble guanylate cyclase by the activator cinaciguat**

N. Basak Surmeli<sup>[a]</sup> and Michael A. Marletta<sup>\*[a,b]</sup>

**Figure S1:** Loss of heme from ferrous sGC. UV-visible spectra of ferrous sGC (1.9  $\mu\text{M}$ ) in the presence of the apoMb H64Y/V68F trap (50  $\mu\text{M}$ ) over the 15 hr timecourse. The activity of ferrous sGC after a 15 hr incubation with apoMb H64Y/V68F trap (inset).

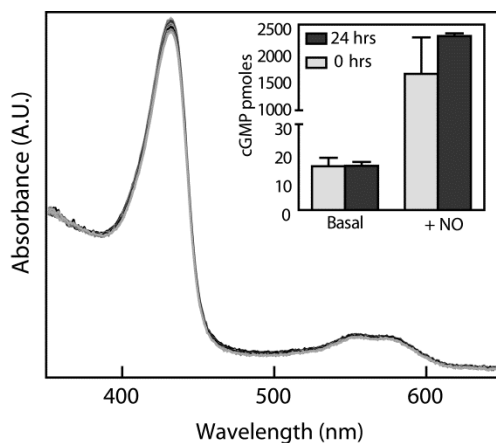

**Figure S2:** The rates of heme dissociation from oxidized sGC heme domains ( $\beta 1(1-194)$ ,  $\beta 1(1-385)$  and  $\beta 2(1-217)$ ) were determined in a similar manner to full length sGC (A). The maximum spectral changes were fitted to a one phase exponential growth to obtain rate constants. The half-life ( $t_{1/2}$ ) calculated from these rate constants are shown in comparison to oxidized full length sGC (B).

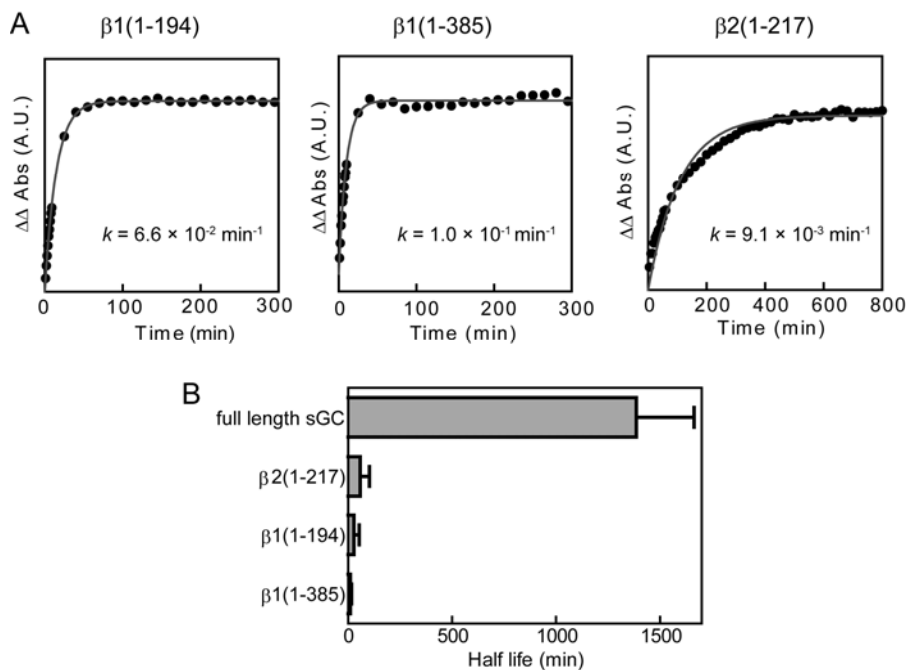

**Figure S3:** No heme loss from ferrous sGC ( $0.8 \mu\text{M}$ ) was observed in the presence of cinaciguat ( $8 \mu\text{M}$ ) with the apoMb H64Y/V68F trap ( $50 \mu\text{M}$ ) during 15 hr of incubation at  $22^\circ\text{C}$ . The changes in UV-visible spectra are due to light scattering rather than heme loss since there was no shift in the Soret absorbance maximum ( $430 \text{ nm}$ ).

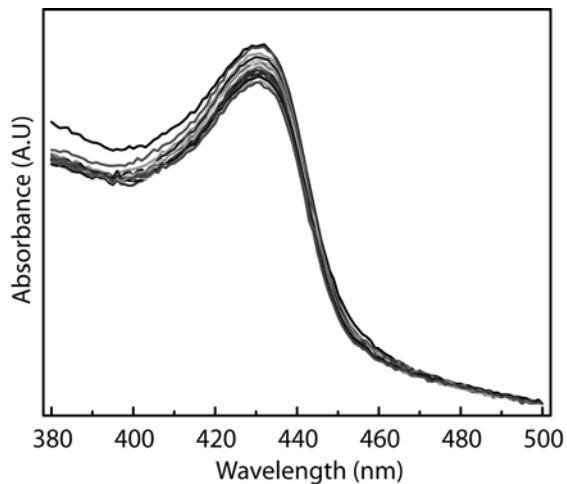

**Figure S4:** Change in activity of oxidized sGC during heme replacement by cinaciguat. Correlation of oxidized sGC ( $1.8 \mu\text{M}$ ) heme loss with activity in the presence of cinaciguat ( $20 \mu\text{M}$ ) is shown.

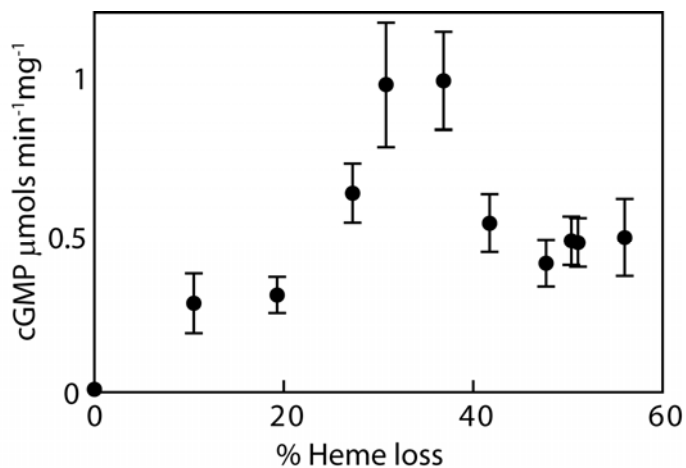

**Figure S5:** Comparison of oxidized sGC (1.8  $\mu\text{M}$ ) activity alone (black) with time and in the presence of cinaciguat (20  $\mu\text{M}$ ) (gray).

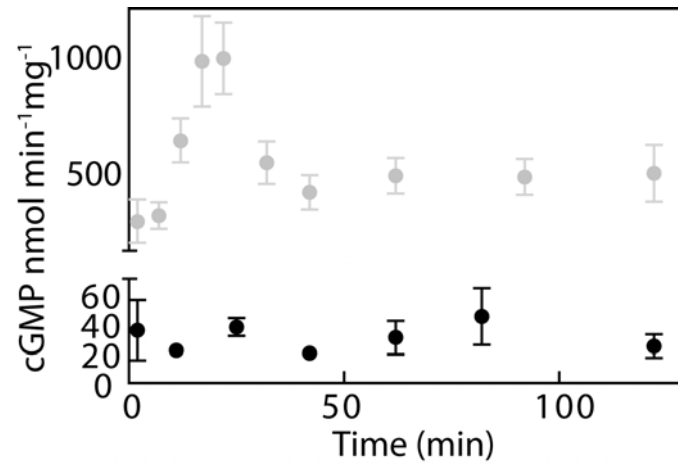

## SUPPORTING EXPERIMENTAL PROCEDURES

*Purification of Mb(H64Y/V68F):* RP523 *E. coli* cells containing the pCW vector with Mb(H64Y/V68F) were grown in TB media containing ampicillin (100 µg/mL) and hemin (30 µg/mL) at 37°C. Expression of Mb(H64Y/V68F) was induced by addition of IPTG (1 mM) and was allowed to occur for 16-18 hrs at 22°C. Cells were harvested by centrifugation and frozen at -80 °C. Cell pellets were thawed on ice and resuspended in buffer A (100 mL, 50 mM sodium phosphate at pH 8.0, 200 mM NaCl, 1 mM benzamidine hydrochloride). Pefabloc (1 mM) and DNase I were added during lysis. The resuspended cells underwent homogenization (EmulsiFlex-C5 homogenizer) and centrifugation (Optima XL-100K) at 40,000 rpm for 1-2 hrs. The supernatant was applied at 0.5 mL/min to a Ni<sub>2</sub>NTA Superflow column (Qiagen) that had been equilibrated with buffer A. The column was washed at 1 mL/min with buffer A containing 25 mM imidazole until the absorbance at 280 nm was constant. The protein was then eluted at 1 mL/min with buffer A containing 250 mM imidazole. The eluate was concentrated to 3 mL using a Vivaspin 20 5,000 MWCO PES concentrator and loaded onto the size exclusion column (HiLoad 26/60 Superdex 75 column, GE Healthcare). The protein was then separated with an isocratic flow of buffer B (50 mM HEPES at pH 7.5, 50 mM NaCl) at 0.4 mL/min and 4 mL fractions were collected.

*Purification of β1(1-194):* Expression and purification of β1(1-194) was identical to Mb(H64Y/V68F) except the following changes. Cell lysis was accomplished in buffer C (50 mM sodium phosphate at pH 8.0, 300 mM NaCl, 5% glycerol, 5 mM β-mercaptoethanol, and 1 mM benzamidine hydrochloride). The Ni<sub>2</sub>NTA Superflow column was also equilibrated with buffer C. After loading the supernatant the column was washed with buffer C containing 25 mM imidazole. The protein was eluted in buffer C containing 150 mM imidazole. During the size exclusion step the protein was separated with an isocratic flow of buffer D (50 mM TEA at pH 7.5, 150 mM NaCl, 5 % glycerol and 5 mM dithiothreitol).

*Heme-dissociation from sGC heme-domains:* As in with full length sGC, the rates of heme dissociation were determined from the decrease in Soret absorbance of sGC heme domains, and the concurrent increase in myoglobin H64Y/V68F Soret absorbance. The experiments were conducted identical to the full length experiments with the following changes. The proteins (18-23 µM) were oxidized with potassium ferricyanide (10 mM) in buffer E (50 mM Hepes at pH 7.4, 50 mM NaCl). Excess ferricyanide was removed by buffer exchange to buffer E using PD MiniTrap™ G-25 (GE Healthcare). The proteins were then diluted to a final concentration of 1 µM and apoMb(H64Y/V68F) was added to a final concentration of 20 µM in buffer E.

*Determination of heme-dissociation rate constants:* The maximal absorbance difference between two wavelengths (391 nm and 417 nm for ferric sGC) was chosen to fit equation (1) below to obtain rate constants where  $k$  is the rate constant,  $t$  is time, and  $\Delta\Delta Abs = Abs_{391} - Abs_{417}$ .

$$\Delta\Delta Abs = y_0 + (Plateau - y_0) \times (1 - e^{-kt}) \quad (1)$$
